# Supplementary material for: Insights from Bacillus anthracis strains isolated from permafrost in the tundra zone of Russia
Source: PLoS One. 2019 May 22;14(5):e0209140. doi: 10.1371/journal.pone.0209140 (PMC6530834; doi:10.1371/journal.pone.0209140)
Supplement: S1 Table — The read archive or assembly accession number are indicated, together with strain name, canSNP assignment, lineage within the A.Br008/009 polytomies (when relevant), country of origin and indication of the subset of entries used in the making of each of the figures. The 11 SRCAMB strains are read archives ERR3170358 to ERR3170368. A number of archives are duplicates or redundant as indicated in the “comments” column. (XLSX) [file pone.0209140.s003.xlsx]

## Sheet: S1 Table evaluated wgs archives
Key	Strain	canSNP_inferred	polytomies	Country	used in Figure1	used in Figure2	used in S1 Figure	used in S2 Figure	comment
DRR000183	BA_103	A.Br.001/002		Japan
DRR000184	BA_104	A.Br.Aust94		Japan					duplicate
DRR000185	BA_103	A.Br.001/002		Japan					duplicate
DRR000186	BA_104	A.Br.Aust94		Japan
DRR014735	Zambia_01 (CZC5)	A.Br.005/006		Zambia					duplicate
DRR014736	Zambia_02 (LZp)	A.Br.005/006		Zambia					duplicate
DRR014737	Zambia_03 (LZt)	A.Br.005/006		Zambia					duplicate
DRR014738	CZC5	duplicate		Zambia					duplicate
DRR014739	Zambia_05 (H29)	A.Br.005/006		Zambia
DRR014740	Zambia_06 (M4)	A.Br.005/006		Zambia					duplicate
DRR014741	Zambia_07 (M37-1)	A.Br.005/006		Zambia			x
DRR014742	Zambia_08 (LZ88-1)	A.Br.005/006		Zambia					duplicate
DRR118317	NL2016_1	A.Br.005/006		Zambia
DRR118318	NL2016_2	A.Br.005/006		Zambia
DRR118319	NL2016_3	A.Br.005/006		Zambia
DRR125653	Mongu1	A.Br.005/006		Zambia
DRR125654	Han19	A.Br.005/006		Zambia
DRR125655	LZ3	A.Br.005/006		Zambia
DRR125656	LZ131001	A.Br.005/006		Zambia
DRR125657	LZ88	A.Br.005/006		Zambia
DRR128181	Morioka	A.Br.001/002		Japan
DRR128182	Akita-80	A.Br.001/002		Japan
DRR128183	BA102	A.Br.001/002		Japan
DRR128184	BA105	A.Br.Aust94		Japan
DRR128185	BA107	A.Br.Aust94		Japan
DRR128186	BA108	A.Br.001/002		Japan
DRR128187	BA109	A.Br.Aust94		Japan
DRR128188	BA111	A.Br.001/002		Japan					cover pb
DRR128189	Tokushima1	A.Br.001/002		Japan
DRR128190	GunmaI	A.Br.008/011	A.Br.008/011_Tsiankovskii	Japan
DRR128191	6172	A.Br.Aust94		Japan
DRR128192	6166	A.Br.Aust94		Japan
DRR150094	Shikan-NIID	A.Br.Ames		Japan					duplicate
DRR152630	PAII (vaccine strain, presumably from Pasteur institute 1997)	A.Br.008/011	A.Br.008/011_Tsiankovskii
ERR1198958	ANSES_101	A.Br.011/009		France					duplicate
ERR1198959	ANSES_118	A.Br.011/009	A.Br.011/009_L4	France
ERR1198960	ANSES_122	A.Br.011/009	A.Br.011/009_L6	France
ERR1198961	ANSES_032	A.Br.011/009	A.Br.011/009_L2	France			x
ERR1198962	ANSES_086	A.Br.011/009	A.Br.011/009_L3_PasteurII	France
ERR1198963	ANSES_088	A.Br.011/009	A.Br.011/009_L5	France		x
ERR1198964	ANSES_089	A.Br.011/009	A.Br.011/009_L1	France					redundant
ERR1198965	ANSES_090	A.Br.011/009	A.Br.011/009_L3	France
ERR1198966	ANSES_092	A.Br.011/009	A.Br.011/009_L1	France
ERR1198967	ANSES_094	A.Br.011/009	A.Br.011/009_L2	France					redundant
ERR1305965	JF3783	A.Br.Vollum		Switzerland					redundant
ERR1305966	JF3784	A.Br.Vollum		Switzerland
ERR1305967	JF3785	A.Br.Vollum		Switzerland					duplicate
ERR1305968	JF3786	A.Br.Vollum		Switzerland					duplicate
ERR1305969	JF3787	A.Br.Vollum		Switzerland					duplicate
ERR1305970	JF3788	A.Br.Vollum		Switzerland
ERR1596541	ANSES_08-06	B.Br.CNEVA		France
ERR1596542	ANSES_08-07	A.Br.001/002		France					duplicate
ERR1596543	ANSES_08-09	A.Br.001/002		France					duplicate
ERR1596544	ANSES_08-10	A.Br.001/002		France					duplicate
ERR1596545	ANSES_08-11	A.Br.001/002		France					duplicate
ERR1596546	ANSES_08-13	A.Br.001/002		France					duplicate
ERR1596547	ANSES_08-14	A.Br.001/002		France					duplicate
ERR1596548	ANSES_08-15	A.Br.001/002		France					duplicate
ERR1596549	ANSES_08-16	A.Br.001/002		France					duplicate
ERR1596550	ANSES_08-19	A.Br.001/002		France					duplicate
ERR1596551	ANSES_08-20	A.Br.001/002		France					duplicate
ERR1596552	ANSES_08-21-1	A.Br.001/002		France					duplicate
ERR1596553	ANSES_08-21-2	A.Br.001/002		France
ERR1596554	ANSES_08-21-3	A.Br.001/002		France					duplicate
ERR1596555	ANSES_08-22-2	A.Br.001/002		France					duplicate
ERR1596556	ANSES_08-24	A.Br.001/002		France					duplicate
ERR1596557	ANSES_08-25	A.Br.001/002		France					duplicate
ERR1596558	ANSES_08-26	A.Br.001/002		France					duplicate
ERR1596559	ANSES_08-27	A.Br.001/002		France					duplicate
ERR1596560	ANSES_08-28	A.Br.001/002		France					duplicate
ERR1596561	ANSES_08-29	A.Br.001/002		France					duplicate
ERR1596562	ANSES_09-08	A.Br.011/009	A.Br.011/009_L1	France
ERR1596563	ANSES_09-13	A.Br.011/009	A.Br.011/009_L6	France		x
ERR1596564	ANSES_09-28	B.Br.CNEVA		France					duplicate
ERR1596565	ANSES_09-29	B.Br.CNEVA		France					duplicate
ERR1596566	ANSES_09-30	B.Br.CNEVA		France					duplicate
ERR1596567	ANSES_09-32	B.Br.CNEVA		France					duplicate
ERR1596568	ANSES_09-33	B.Br.CNEVA		France					duplicate
ERR1596569	ANSES_09-34	B.Br.CNEVA		France					duplicate
ERR1596570	ANSES_09-35	B.Br.CNEVA		France					duplicate
ERR1596571	ANSES_09-36	B.Br.CNEVA		France					duplicate
ERR1596572	ANSES_09-38	B.Br.CNEVA		France					duplicate
ERR1596573	ANSES_09-39	B.Br.CNEVA		France					duplicate
ERR1596574	ANSES_09-40	B.Br.CNEVA		France
ERR1596575	ANSES_09-41	B.Br.CNEVA		France					duplicate
ERR1596576	ANSES_09-42	B.Br.CNEVA		France					duplicate
ERR1596577	ANSES_09-43	B.Br.CNEVA		France
ERR1596578	ANSES_09-44	B.Br.CNEVA		France					duplicate
ERR1596579	ANSES_09-45	B.Br.CNEVA		France
ERR1596580	ANSES_09-46	B.Br.CNEVA		France
ERR1596581	ANSES_100	A.Br.011/009	A.Br.011/009_L3	France
ERR1596582	ANSES_102	A.Br.011/009	A.Br.011/009_L1	France
ERR1596583	ANSES_103	A.Br.011/009		France					duplicate
ERR1596584	ANSES_104	A.Br.011/009		France					duplicate
ERR1596585	ANSES_105	B.Br.CNEVA		France					duplicate
ERR1596586	ANSES_106	B.Br.CNEVA		France
ERR1596587	ANSES_107	B.Br.CNEVA		France					duplicate
ERR1596588	ANSES_108	B.Br.CNEVA		France					duplicate
ERR1596589	ANSES_109	B.Br.CNEVA		France					duplicate
ERR1596590	ANSES_11-04	A.Br.001/002		France					duplicate
ERR1596591	ANSES_11-05	A.Br.011/009		France					duplicate
ERR1596592	ANSES_11-08	B.Br.CNEVA		France
ERR1596593	ANSES_11-09	B.Br.CNEVA		France	x
ERR1596594	ANSES_11-10	B.Br.CNEVA		France
ERR1596595	ANSES_11-11	B.Br.CNEVA		France					duplicate
ERR1596596	ANSES_112	B.Br.CNEVA		France
ERR1596597	ANSES_113	B.Br.CNEVA		France					duplicate
ERR1596598	ANSES_114	B.Br.CNEVA		France					duplicate
ERR1596599	ANSES_115	B.Br.CNEVA		France
ERR1596600	ANSES_116	A.Br.011/009	A.Br.011/009_L1	France
ERR1596601	ANSES_117	B.Br.CNEVA		France					duplicate
ERR1596602	ANSES_119	B.Br.CNEVA		France
ERR1596603	ANSES_120	B.Br.CNEVA		France	x
ERR1596604	ANSES_123	B.Br.CNEVA		France
ERR1596605	ANSES_124	A.Br.011/009	A.Br.011/009_L2	France
ERR1596606	ANSES_126	B.Br.CNEVA		France					duplicate
ERR1596607	ANSES_136	A.Br.011/009	A.Br.011/009_L1	France					redundant
ERR1596608	ANSES_139	B.Br.CNEVA		France	x
ERR1596609	ANSES_140	B.Br.CNEVA		France					duplicate
ERR1596610	ANSES_143	A.Br.011/009		France					duplicate
ERR1596611	ANSES_017	B.Br.CNEVA		France
ERR1596612	ANSES_018	B.Br.CNEVA		France
ERR1596613	ANSES_030	A.Br.011/009	A.Br.011/009_L1	France					redundant
ERR1596614	ANSES_031	B.Br.CNEVA		France
ERR1596615	ANSES_033	B.Br.CNEVA		France
ERR1596616	ANSES_034	A.Br.011/009	A.Br.011/009_L1	France
ERR1596617	ANSES_035	B.Br.CNEVA		France					duplicate
ERR1596618	ANSES_036	B.Br.CNEVA		France					redundant
ERR1596619	ANSES_037	B.Br.CNEVA		France					redundant
ERR1596620	ANSES_039	B.Br.CNEVA		France
ERR1596621	ANSES_040	B.Br.CNEVA		France
ERR1596622	ANSES_041	B.Br.CNEVA		France					duplicate
ERR1596623	ANSES_044	B.Br.CNEVA		France					redundant
ERR1596624	ANSES_045	B.Br.CNEVA		France	x
ERR1596625	ANSES_050	B.Br.CNEVA		France
ERR1596626	ANSES_051	B.Br.CNEVA		France					redundant
ERR1596627	ANSES_063	B.Br.CNEVA		France
ERR1596628	ANSES_064	B.Br.CNEVA		France	x
ERR1596629	ANSES_066	B.Br.CNEVA		France					duplicate
ERR1596630	ANSES_067	B.Br.CNEVA		France					redundant
ERR1596631	ANSES_072	B.Br.CNEVA		France					duplicate
ERR1596632	ANSES_073	B.Br.CNEVA		France					duplicate
ERR1596633	ANSES_075	B.Br.CNEVA		France					duplicate
ERR1596634	ANSES_077	B.Br.CNEVA		France					duplicate
ERR1596635	ANSES_079	B.Br.CNEVA		France					duplicate
ERR1596636	ANSES_79-80	B.Br.CNEVA		France					duplicate
ERR1596637	ANSES_080	B.Br.CNEVA		France
ERR1596638	ANSES_082	B.Br.CNEVA		France					duplicate
ERR1596639	ANSES_087	A.Br.011/009	A.Br.011/009_L1	France
ERR1596640	ANSES_093	A.Br.011/009	A.Br.011/009_L2	France
ERR1596641	ANSES_095	A.Br.011/009	A.Br.011/009_L2	France
ERR1596642	ANSES_97-140	B.Br.CNEVA		France					duplicate
ERR1596643	ANSES_098	B.Br.CNEVA		France	x
ERR1596644	ANSES_099	A.Br.011/009		France					duplicate
ERR1596645	CNEVA-9066 (alias ANSES_121)	B.Br.CNEVA_B.Br.006_CNEVA9066		France	x		x
ERR1596646	ANSES_091	A.Br.005/006		Cameroon
ERR1841046	ANSES_052 (CIP 53.169)	A.Br.001/002		France
ERR1841047	ANSES_054 (CIP 81.89)	A.Br.001/002		France
ERR1841048	ANSES_056 (CIP 74.12, Pasteur II)	A.Br.011/009	A.Br.011/009_L3_PasteurII	France
ERR1841049	ANSES_058 (CIP A211)	A.Br.001/002		France
ERR1841050	ANSES_059 (CIP A206)	A.Br.011/009	A.Br.011/009_L2	France
ERR1841051	ANSES_060 (CIP A205)	A.Br.011/009	A.Br.011/009_L4	France
ERR1841052	ANSES_061 (CIP A204)	A.Br.011/009	A.Br.011/009_L2	France
ERR3170358	Yamal_2_IonXpress_059	B.Br.001/002		Russia (Yamal)	x		x	x
ERR3170359	Yamal_8_IonXpress_058	B.Br.001/002		Russia (Yamal)	x		x	x
ERR3170360	Yamal_10_IonXpress_057	B.Br.001/002		Russia (Yamal)	x		x	x
ERR3170361	Yamal_12_IonXpress_060	B.Br.001/002		Russia (Yamal)	x		x	x
ERR3170362	LP50_3Ya	A.Br.008/011	A.Br.008/011_Tsiankovskii	Russia (Yakutia)		x	x
ERR3170363	LP51_4Ya	A.Br.008/011	A.Br.008/011_STI	Russia (Yakutia)		x	x
ERR3170364	LP53_5Ya	B.Br.001/002		Russia (Yakutia)	x		x	x
ERR3170365	1056/51	A.Br.008/011	A.Br.008/011_Tsiankovskii	Russia		x	x
ERR3170366	I-364	B.Br.001/002		Russia (Siberia)	x		x
ERR3170367	157(B1107)	B.Br.001/002		Estonia	x		x
ERR3170368	B-ant-44	B.Br.CNEVA		unknown
ERR878501	Pollino	A.Br.011/009	A.Br.011/009_L2	Italy					duplicate
ERR878502	Pollino	A.Br.011/009	A.Br.011/009_L2	Italy
ERR878503	Pollino	A.Br.011/009	A.Br.011/009_L2	Italy					duplicate
ERR878504	Pollino	A.Br.011/009	A.Br.011/009_L2	Italy					duplicate
ERR878505	Pollino	A.Br.011/009	A.Br.011/009_L2	Italy					duplicate
ERR878506	Pollino	A.Br.011/009	A.Br.011/009_L2	Italy					duplicate
ERR878507	Pollino	A.Br.011/009	A.Br.011/009_L2	Italy					duplicate
ERR878508	Pollino	A.Br.011/009	A.Br.011/009_L2	Italy					duplicate
ERR878509	Pollino	A.Br.011/009	A.Br.011/009_L2	Italy					duplicate
ERR878510	Pollino	A.Br.011/009	A.Br.011/009_L2	Italy					duplicate
ERR878512	Pollino	A.Br.011/009	A.Br.011/009_L2	Italy					duplicate
ERR878513	Pollino	A.Br.011/009	A.Br.011/009_L2	Italy					duplicate
ERR878514	Pollino	A.Br.011/009	A.Br.011/009_L2	Italy					duplicate
ERR878515	Pollino	A.Br.011/009	A.Br.011/009_L2	Italy					duplicate
ERR878516	Pollino	A.Br.011/009	A.Br.011/009_L2	Italy					duplicate
ERR878517	Pollino	A.Br.011/009	A.Br.011/009_L2	Italy					duplicate
ERR878518	Pollino	A.Br.011/009	A.Br.011/009_L2	Italy					duplicate
ERR878519	Pollino	A.Br.011/009	A.Br.011/009_L2	Italy					duplicate
ERR899844	JF3852	B.Br.CNEVA		Switzerland					redundant
ERR899845	JF3853	A.Br.Aust94		Switzerland
ERR899846	JF3854	B.Br.CNEVA		Switzerland	x
ERR899847	JF3887	B.Br.CNEVA		Switzerland	x
ERR899848	JF3888	B.Br.CNEVA		Switzerland
ERR930296	K169/66	A.Br.008/011	A.Br.008/011_Heroin	Denmark
ERR930297	K670/88	A.Br.Ames		Denmark
ERR930298	K35/88	A.Br.Ames		Denmark					redundant
ERR930299	K929	A.Br.001/002		Denmark
ERR930300	1409	A.Br.Aust94		Denmark
ERR930301	K836	A.Br.005/006		Denmark
ERR930302	strain A	A.Br.001/002		Denmark
ERR930303	strain B (DK8)	A.Br.001/002		Denmark
ERR930304	strain C (DK9)	A.Br.001/002		Denmark
ERR930305	strain D (DK10)	A.Br.008/011	A.Br.008/011_Heroin	Denmark
ERR930306	strain E (DK11)	A.Br.005/006		Denmark
GCA_000006155	A2012	A.Br.Ames							long_terminal_SNP_branch
GCA_000167235	CNEVA-9066	B.Br.CNEVA							duplicate
GCA_000167255	A1055	C.Br.001		USA					duplicate
GCA_000167275	Vollum	duplicate							duplicate
GCA_000167315	Western North America USA6153	A.Br.WNA		USA					duplicate
GCA_000167335	Australia 94	A.Br.Aust94		Australia			x
GCA_000181835	A0488 (ABJC)	A.Br.Vollum		UK
GCA_000181915	A0193 (ABKF)	A.Br.WNA		USA
GCA_000181935	A0442	B.Br.Kruger		South Africa					duplicate
GCA_000181995	A0465 (ABLH01; RA3)	B.Br.CNEVA		France
GCA_000182055	A0174 (ABLT01)	A.Br.WNA		Canada
GCA_000219895	A0389 (ABLB)	A.Br.001/002		Indonesia					duplicate
GCA_000292565	UR-1	A.Br.008/011	A.Br.008/011_Heroin	Germany
GCA_000295695	BF1 (AMDT)	B.Br.CNEVA		Germany					duplicate
GCA_000310045	Carbosap	A.Br.011/009	A.Br.011/009_L3_PasteurII	France
GCA_000359445	Sen3	A.Br.011/009		Senegal					duplicate
GCA_000359465	Gmb1	A.Br.011/009		Gambia					duplicate
GCA_000521345	V770-NP1-R	duplicate							duplicate
GCA_000534935	CZC5	A.Br.005/006		Zambia
GCA_000697515	ANSES_08-8_20	A.Br.001/002		France
GCA_000697535	ANSES_99-100	A.Br.011/009	A.Br.011/009_L3	France					redundant
GCA_000697555	ANSES_00-82	B.Br.CNEVA_B.Br.005_ANSES0082		France	x
GCA_000732465	Carbosap	A.Br.011/009	A.Br.011/009_L3_PasteurII						duplicate
GCA_000740925	STI-1	A.Br.008/011	A.Br.008/011_STI	Russia					duplicate A0485
GCA_000742315	Smith 1013 (Pasteur-like)	A.Br.008/011	A.Br.008/011_Pasteur	unknown
GCA_000742695	delta Sterne	duplicate		unknown					duplicate
GCA_000742875	BFV	A.Br.001/002		Jamaica
GCA_000743805	Zimbabwe 89	B.Br.001/002_B.Br.011_Zimbabwe 89		Zimbabwe	x
GCA_000743825	Scotland (BHY_1)	A.Br.Aust94		UK
GCA_000782875	2000031006	A.Br.WNA		USA					duplicate
GCA_000782885	2000031023	A.Br.003/004		unknown					duplicate
GCA_000782895	2000031027	duplicate		USA					duplicate
GCA_000782905	2000032892	A.Br.005/007		unknown
GCA_000782955	2000031031	duplicate		USA					duplicate
GCA_000782975	2000031039	A.Br.003/004		unknown					duplicate
GCA_000782995	2000031052	duplicate		USA					duplicate
GCA_000783015	2000031075	duplicate		South Africa					duplicate
GCA_000783035	2000031709	duplicate		USA					duplicate
GCA_000783055	2000031765	A.Br.WNA		unknown					duplicate
GCA_000783075	2000032819	A.Br.WNA		unknown					duplicate
GCA_000783095	2000032879	duplicate		unknown					duplicate
GCA_000783115	2000032951	duplicate		unknown					duplicate
GCA_000783135	2000032967	duplicate		unknown					duplicate
GCA_000783155	2000032968	duplicate		unknown					duplicate
GCA_000783165	2000032975	duplicate		unknown					duplicate
GCA_000783195	2000032979	duplicate		USA					duplicate
GCA_000783215	2000032989	A.Br.WNA		unknown					duplicate
GCA_000783235	2002013094	C.Br.001		USA					duplicate
GCA_000793525	2000031008	duplicate		USA					duplicate
GCA_000793545	2000032832	A.Br.WNA		unknown					duplicate
GCA_000793565	2000031038	duplicate		unknown					duplicate
GCA_000808075	A0157 (NR-1041; derived from ATCC4728)	A.Br.008/011	A.Br.008/011_Pasteur	USA
GCA_000831505	Pollino	A.Br.011/009	A.Br.011/009_L2	Italy					duplicate
GCA_000986915	A1039	A.Br.003/004		Bolivia					duplicate
GCA_000986935	A1075	A.Br.003/004		Chile					duplicate
GCA_001015005	44-NIAH	A.Br.001/002		misssing
GCA_001015025	52-40-NIAH	A.Br.001/002		misssing
GCA_001272985	K1285	duplicate		Namibia					duplicate
GCA_001273005	K2129 (22/32: A0032)	A.Br.008/011		China					duplicate
GCA_001273025	K2883	duplicate		India					duplicate
GCA_001273045	K0021	A.Br.011/009	A.Br.011/009_L2	Italy					duplicate
GCA_001273065	K4834	duplicate		Australia					duplicate
GCA_001273085	K3974 (A22; A0324)	A.Br.008/011		Slovakia					duplicate
GCA_001273105	K1129	duplicate		Pakistan					duplicate
GCA_001273125	K8215	A.Br.003/004		Argentina					duplicate
GCA_001273145	PAK-1	A.Br.008/011		Pakistan					duplicate
GCA_001276995	A0389	duplicate		Indonesia					duplicate
GCA_001277085	A0021	A.Br.005/006		Zambia					duplicate
GCA_001277955	Larissa	A.Br.008/011	A.Br.008/011_Tsiankovskii	Greece		x
GCA_001677295	K2	A.Br.Aust94		Namibia
GCA_001677305	K1	A.Br.Aust94		Namibia
GCA_001835485	55-VNIIVViM	A.Br.008/011	A.Br.008/011_STI	Georgia
GCA_002005265	Sterne 34F2	A.Br.001/002		not collected					duplicate
GCA_002007035	Brazilian Vaccinal	A.Br.001/002		Brazil					Sterne group
GCA_002019425	Ba-8884/94-Geo	A.Br.008/011	A.Br.008/011_STI	Georgia
GCA_002025265	Ba-8785/92-Geo	A.Br.008/011	A.Br.008/011_STI	Georgia
GCA_002025275	Ba-8784/92-Geo	A.Br.008/011	A.Br.008/011_STI	Georgia					duplicate
GCA_002025335	Ba-7673/89-Geo	A.Br.008/011	A.Br.008/011_STI	Georgia
GCA_002025345	Ba-9065/08-Geo	A.Br.Aust94		Georgia
GCA_002025375	Ba-1897/12-Geo	A.Br.Aust94		Georgia
GCA_002025395	Ba-8782/92-Geo	A.Br.008/011		Georgia					duplicate
GCA_002025415	Ba-9108/08-Geo	A.Br.Aust94		Georgia
GCA_002025435	Ba-1802/12-Geo	A.Br.Aust94		Georgia
GCA_002025455	Ba-8776/92-Geo	A.Br.Aust94		Georgia
GCA_002233635	DS201579	A.Br.005/006		South Africa
GCA_002525685	BA663	A.Br.001/002		not applicable					Sterne group
GCA_002525695	BA781	A.Br.001/002		not applicable					Sterne group
GCA_002525705	BA500	A.Br.001/002		not applicable					Sterne group
GCA_002525715	34F2_Sterne	A.Br.001/002		not applicable					Sterne group
GCA_002525765	BAP417	A.Br.001/002		not applicable					redundant
GCA_002525775	BAP482	A.Br.001/002		not applicable					redundant
GCA_002525785	BA721	A.Br.001/002		not applicable					Sterne group
GCA_002896575	Kafkas-100	A.Br.Aust94		Turkey
GCA_002896585	Kafkas-149	A.Br.Aust94		Turkey
GCA_002896595	Kafkas-78	A.Br.Aust94		Turkey
GCA_002896635	Kafkas-86	A.Br.Aust94		Turkey
GCA_002896655	Kafkas-215	A.Br.Aust94		Turkey
GCA_002896665	Kafkas-68	A.Br.Aust94		Turkey
GCA_002896695	Kafkas-60	A.Br.Aust94		Turkey
GCA_002980615	STI1	A.Br.008/011		Russia					duplicate A0485
GCA_003045745	COVASU	A.Br.Vollum		India					duplicate
GCA_003063925	BA2968	B.Br.001/002		Finland	x
GCA_003063945	HKI4363/88	A.Br.003/004		Finland
GCA_003063965	A142	A.Br.003/004		Germany
GCA_003063985	A155	A.Br.003/004		Germany
GCA_003064005	SA047	A.Br.003/004		South Africa
GCA_003064015	A16/LA896	B.Br.CNEVA		Switzerland	x
GCA_003064045	A24/TN_Bovine_Sokol	B.Br.CNEVA		Slovakia	x
GCA_003064085	A46	B.Br.CNEVA		Germany	x
GCA_003335125	Sterne 09RA8929	A.Br.001/002							Sterne group
GCA_003345105	UT308	A.Br.Aust94							duplicate
GCA_003367985	2000031103 (Strain 32)	A.Br.Aust94		United Kingdom					duplicate
GCA_003368005	2007740863 (SK57)	A.Br.Aust94		United Kingdom					duplicate
GCA_003860145	81/1	A.Br.008/011	A.Br.008/011_Tsiankovskii	Russia
GCA_900011745	ANSES_94	A.Br.011/009	A.Br.011/009_L2						duplicate
GCA_900012555	ANSES_86	A.Br.011/009	A.Br.011/009_L3						duplicate
GCA_900013465	ANSES_101	A.Br.011/009	A.Br.011/009_L1	France					redundant
GCA_900013475	ANSES_89	A.Br.011/009	A.Br.011/009_L1						duplicate
GCA_900013485	ANSES_92	A.Br.011/009	A.Br.011/009_L1						duplicate
GCA_900014335	ANSES_118	A.Br.011/009							duplicate
GCA_900014345	ANSES_122	A.Br.011/009							duplicate
GCA_900014355	ANSES_32	A.Br.011/009	A.Br.011/009_L2						duplicate
GCA_900014365	ANSES_88	A.Br.011/009	A.Br.011/009_L5						duplicate
GCA_900014375	ANSES_90	A.Br.011/009	A.Br.011/009_L3						duplicate
GCF_000007845	Ames	duplicate							duplicate
GCF_000008165	Sterne	A.Br.001/002		nd					duplicate
GCF_000008445	Ames Ancestor; A2084	A.Br.Ames		USA			x
GCF_000021445	CDC 684	A.Br.Vollum		USA
GCF_000022865	A0248	A.Br.Ames							duplicate
GCF_000167255	A1055	C.Br.001		USA					duplicate
GCF_000167295	Kruger B	B.Br.Kruger_B.Br.010_KrugerB		South Africa	x		x
GCF_000167315	Western North America USA6153	A.Br.WNA	A.Br.WNA	USA			x
GCF_000167335	Australia 94	A.Br.Aust94		Australia					duplicate
GCF_000181675	Tsiankovskii-I	A.Br.008/011	A.Br.008/011_Tsiankovskii	FSU		x	x
GCF_000181835	A0488	A.Br.Vollum		UK					duplicate
GCF_000181915	A0193	A.Br.WNA	A.Br.WNA	USA					duplicate
GCF_000181935	A0442	B.Br.Kruger		South Africa	x
GCF_000181995	A0465	B.Br.CNEVA		France					duplicate
GCF_000182055	A0174	A.Br.WNA	A.Br.WNA	Canada					duplicate
GCF_000219895	A0389	A.Br.001/002		Indonesia					duplicate
GCF_000258885	H9401	A.Br.005/007		Korea			x
GCF_000278385	Heroin Ba4599	A.Br.008/011	A.Br.008/011_Heroin	Scotland			x
GCF_000292565	UR-1	A.Br.008/011		Germany					duplicate
GCF_000295695	BF1	B.Br.CNEVA_B.Br.004_BF1		Germany	x
GCF_000319695	3154	A.Br.008/011	A.Br.008/011_Pasteur	Bulgaria		x
GCF_000319715	3166	A.Br.008/011	A.Br.008/011_Pasteur	Bulgaria		x
GCF_000359425	Sen2Col2	A.Br.011/009	A.Br.011/009_L2	Senegal			x
GCF_000359445	Sen3	A.Br.011/009	A.Br.011/009_L2	Senegal
GCF_000359465	Gmb1	A.Br.011/009	A.Br.011/009_L2	Gambia
GCF_000512775	A16R	A.Br.001/002		nd
GCF_000512835	A16	A.Br.001/002		missing
GCF_000534935	CZC5	A.Br.005/006		Zambia					duplicate
GCF_000558965	8903-G	A.Br.Aust94		Georgia
GCF_000558985	9080-G	A.Br.Aust94		Georgia
GCF_000559005	52-G	A.Br.Aust94		Georgia
GCF_000583105	SVA11	B.Br.001/002		Sweden					duplicate
GCF_000585275	95014	A.Br.011/009	A.Br.011/009_L3_PasteurII
GCF_000725325	HYU01	B.Br.001/002_B.Br.002_HYU01		Korea	x		X	x
GCF_000732465	Carbosap	A.Br.011/009	A.Br.011/009_L3	France					duplicate
GCF_000742655	2000031021	C.Br.001		USA					duplicate
GCF_000742895	Vollum	A.Br.Vollum		USA					duplicate
GCF_000747335	Cvac02	A.Br.008/011	A.Br.008/011_Tsiankovskii	China		x
GCF_000747375	Han	A.Br.001/002		China
GCF_000830095	Ames A0462	duplicate		USA					duplicate
GCF_000832425	PAK-1	A.Br.008/011	A.Br.008/011_Heroin	Pakistan					duplicate
GCF_000832445	Vollum 1B	A.Br.Vollum		USA			x
GCF_000832465	K3	A.Br.005/006		South Africa
GCF_000832505	Ohio ACB	A.Br.Aust94		USA
GCF_000832565	SK-102	A.Br.Vollum		USA					duplicate
GCF_000832585	Pasteur	duplicate		Unknown					duplicate
GCF_000832635	Sterne	A.Br.001/002		USA					duplicate
GCF_000832665	BA1015	A.Br.003/004		USA
GCF_000832725	BA1035	B.Br.001/002		South Africa					duplicate
GCF_000832745	RA3	B.Br.CNEVA_B.Br.007_RA3		France	x
GCF_000832785	V770-NP-1R	A.Br.003/004		USA			x
GCF_000832965	2002013094	C.Br.001		USA					duplicate
GCF_000833065	Ames	A.Br.Ames		USA					duplicate
GCF_000833125	A0369 (Canadian bison)	A.Br.WNA	A.Br.WNA	Canada			x
GCF_000833275	Turkey32	duplicate		Turkey					duplicate
GCF_000875715	A1144	A.Br.011/009	A.Br.011/009_L3_PasteurII	Argentina
GCF_001286825	JRS4	cereus							B. cereus_BAcloseneighbor
GCF_001543225	Stendal	A.Br.001/002		Germany
GCF_001654475	Tangail-1	A.Br.001/002		Bangladesh
GCF_001683065	Parent2	A.Br.001/002		USA					Sterne group
GCF_001683095	Parent1	duplicate		USA					duplicate
GCF_001683135	PR01	duplicate		USA					duplicate
GCF_001683155	PR02	A.Br.001/002		USA					redundant
GCF_001683175	PR05	A.Br.001/002		USA					Sterne group
GCF_001683195	PR06	duplicate		USA					duplicate
GCF_001683215	PR07	A.Br.001/002		USA					Sterne group
GCF_001683235	PR08	A.Br.001/002		USA					Sterne group
GCF_001683255	PR09-1	A.Br.001/002		USA					Sterne group
GCF_001683275	PR09-4	A.Br.001/002		USA					Sterne group
GCF_001683295	PR10-4	A.Br.001/002		USA					Sterne group
GCF_001936375	Tyrol 4675	B.Br.CNEVA		Austria	x				duplicate
GCF_001990245	SPV842_15	A.Br.001/002		Brazil					Sterne group
GCF_002208785	FDAARGOS_341	duplicate		USA					duplicate
GCF_002277915	14RA5914	A.Br.001/002		Germany
GCF_002356575	Shikan-NIID	A.Br.Ames		Japan
GCF_003227955	London_499	A.Br.011/009		UK					duplicate
SRR1285612	A0897	A.Br.008/011	A.Br.008/011_Heroin	Ethiopia		x
SRR1318540	A0149 (presumably Turkey32)	A.Br.008/011	A.Br.008/011_Heroin	Turkey					duplicate
SRR1739960	2000031006	A.Br.WNA	A.Br.WNA	USA
SRR1739961	2000031008	A.Br.Vollum		USA
SRR1739962	2000031023	A.Br.003/004		unknown					duplicate
SRR1739963	2000031027	A.Br.Aust94		USA
SRR1739964	2000031031	A.Br.Vollum		USA
SRR1739966	2000031039	A.Br.003/004		unknown
SRR1739967	2000031052	C.Br.001		USA			x
SRR1739968	2000031075	A.Br.001/002		South Africa					Sterne group
SRR1739969	2000031709	A.Br.Vollum		USA			x
SRR1739971	2000032819	A.Br.WNA	A.Br.WNA	unknown					duplicate
SRR1739972	2000032832	A.Br.WNA	A.Br.WNA	unknown
SRR1739973	2000032879	A.Br.001/002		unknown
SRR1739975	2000032951	A.Br.Vollum		unknown
SRR1739976	2000032967	A.Br.Vollum		unknown
SRR1739977	2000032968	A.Br.Vollum		unknown
SRR1739978	2000032975	A.Br.001/002		unknown
SRR1739979	2000032979	A.Br.001/002		USA
SRR1739980	2000032989	A.Br.WNA	A.Br.WNA	unknown
SRR1739981	2002013094	C.Br.001		USA
SRR1774151	A1144	A.Br.011/009	A.Br.011/009_L3	Argentina					duplicate
SRR1776686	Ames	A.Br.Ames		USA					duplicate
SRR1925730	A1075	A.Br.003/004		Chile
SRR1925731	A1039	A.Br.003/004		Bolivia
SRR1993644	SK-102	A.Br.Vollum		USA			x		redundant
SRR1999417	A0264	A.Br.008/011	A.Br.008/011_Heroin	Turkey		x
SRR1999664	2000031055	A.Br.008/011		USA					hypermutator isolate long_terminal_SNP_branch
SRR1999665	2000032945	A.Br.008/011		USA					duplicate
SRR1999666	2000032955	duplicate		USA					duplicate
SRR1999667	2002013072	A.Br.008/011	A.Br.008/011_Heroin	USA		x
SRR1999668	2002721572	A.Br.008/011	A.Br.008/011_Heroin	USA		x
SRR1999669	A4572	duplicate		UK					duplicate
SRR1999670	A4583	duplicate		UK					duplicate
SRR1999671	A4584	duplicate		UK					duplicate
SRR1999672	A4585	duplicate		UK					duplicate
SRR1999673	A4586	duplicate		UK					duplicate
SRR1999674	A4587	duplicate		UK					duplicate
SRR1999675	A4588	duplicate		UK					duplicate
SRR1999676	A4589	A.Br.008/011	A.Br.008/011_Heroin	Scotland
SRR1999677	A4590	A.Br.008/011	A.Br.008/011_Heroin	Scotland
SRR1999678	A4591	duplicate		UK					duplicate
SRR1999679	A4592	duplicate		UK					duplicate
SRR1999680	A4594	duplicate		UK					duplicate
SRR1999681	A4595	duplicate		UK					duplicate
SRR1999682	A4593	duplicate		UK					duplicate
SRR1999683	A4596	duplicate		UK					duplicate
SRR1999684	A4597	duplicate		UK					duplicate
SRR1999685	A4598	duplicate		UK					duplicate
SRR1999686	A4599	A.Br.008/011	A.Br.008/011_Heroin	Scotland
SRR1999687	A4600	duplicate		UK					duplicate
SRR1999688	A4618	duplicate		UK					duplicate
SRR1999689	A4601	duplicate		UK					duplicate
SRR1999690	A4602	duplicate		UK					duplicate
SRR1999691	A4603	duplicate		UK					duplicate
SRR1999692	A4573	A.Br.008/011	A.Br.008/011_Heroin	Scotland
SRR1999693	A4604	duplicate		UK					duplicate
SRR1999694	A4605	duplicate		UK					duplicate
SRR1999695	A4606	duplicate		UK					duplicate
SRR1999696	A4607	A.Br.008/011	A.Br.008/011_Heroin	Scotland
SRR1999697	A4608	duplicate		UK					duplicate
SRR1999698	A4609	duplicate		UK					duplicate
SRR1999699	A4610	duplicate		UK					duplicate
SRR1999700	A4611	duplicate		UK					duplicate
SRR1999701	A4612	duplicate		UK					duplicate
SRR1999702	A4613	duplicate		UK					duplicate
SRR1999703	A4614	duplicate		UK					duplicate
SRR1999704	A4615	A.Br.008/011	A.Br.008/011_Heroin	UK
SRR1999705	A4616	duplicate		UK					duplicate
SRR1999706	A4617	duplicate		UK					duplicate
SRR1999707	A4619	A.Br.008/011		UK					duplicate
SRR1999708	A4620	A.Br.008/011		UK					duplicate
SRR1999709	A4621	A.Br.008/011		UK					duplicate
SRR1999710	A4622	A.Br.008/011	A.Br.008/011_Heroin	UK
SRR1999711	A4623	A.Br.008/011	A.Br.008/011_Heroin	Scotland
SRR1999712	A4624	A.Br.008/011	A.Br.008/011_Heroin	Scotland
SRR1999713	A4574	A.Br.008/011	A.Br.008/011_Heroin	Scotland		x
SRR1999714	A4564	A.Br.008/011	A.Br.008/011_Heroin	Germany
SRR1999715	A4565	duplicate		Germany					duplicate
SRR1999716	A4566	A.Br.008/011		Denmark					duplicate
SRR1999717	A4567	A.Br.008/011		Denmark					duplicate
SRR1999718	A4568	A.Br.008/011	A.Br.008/011_Heroin	Norway		x
SRR1999719	A4571	A.Br.008/011		Germany					duplicate
SRR1999720	A4575	duplicate		UK					duplicate
SRR1999721	A4576	duplicate		UK					duplicate
SRR1999722	A4577	duplicate		UK					duplicate
SRR1999723	A4578	duplicate		UK					duplicate
SRR1999724	A4579	duplicate		UK					duplicate
SRR1999725	A4580	A.Br.008/011	A.Br.008/011_Heroin	Scotland
SRR1999726	A4581	duplicate		UK					duplicate
SRR1999727	A4582	duplicate		UK					duplicate
SRR2071843	K1285	A.Br.Aust94		Namibia
SRR2071845	K2129	A.Br.008/011	A.Br.008/011_STI	China		x
SRR2071849	K2883	A.Br.Aust94		India
SRR2071854	K0021 (1FG, A0280)	A.Br.011/009	A.Br.011/009_L2	Italy
SRR2071866	K4834	A.Br.Aust94		Australia
SRR2071869	K3974	A.Br.008/011	A.Br.008/011_Tsiankovskii	Slovakia		x
SRR2071872	K1129	A.Br.Vollum		Pakistan
SRR2071881	K8215	A.Br.003/004		Argentina
SRR2071886	PAK-1 (A0463)	A.Br.008/011	A.Br.008/011_Heroin	Pakistan		x
SRR2075979	Scotland_459	duplicate		UK					duplicate
SRR2094245	Scotland_472	duplicate		UK					duplicate
SRR2094250	Scotland_474	A.Br.011/009	A.Br.011/009_L2	Guinea
SRR2094253	Scotland_473	duplicate		UK					duplicate
SRR2094254	Scotland_476	duplicate		UK					duplicate
SRR2094255	Scotland_477	duplicate		UK					duplicate
SRR2094256	Scotland_478	duplicate		UK					duplicate
SRR2094257	Scotland_480	A.Br.011/009	A.Br.011/009_L2	Guinea					redundant
SRR2094258	Scotland_479	duplicate		UK					duplicate
SRR2094259	Scotland_481	duplicate		UK					duplicate
SRR2094261	Scotland_482	duplicate		UK					duplicate
SRR2094262	Scotland_484	duplicate		UK					duplicate
SRR2094263	Scotland_483	duplicate		UK					duplicate
SRR2094264	Scotland_485	A.Br.011/009	A.Br.011/009_L2	Guinea
SRR2094265	London_493	duplicate		UK					duplicate
SRR2094266	London_491	A.Br.011/009	A.Br.011/009_L2	UK
SRR2094267	London_496	A.Br.011/009	A.Br.011/009_L2	UK
SRR2094268	London_494	duplicate		UK					duplicate
SRR2094269	London_497	A.Br.011/009	A.Br.011/009_L2	UK
SRR2094270	London_498	A.Br.011/009	A.Br.011/009_L2	UK
SRR2094271	London_499	A.Br.011/009	A.Br.011/009_L2	UK
SRR2094272	London_500	duplicate		UK					duplicate
SRR2094273	London_501	duplicate		UK					duplicate
SRR2133443	A0389	A.Br.001/002		Indonesia
SRR2133444	A0021	A.Br.005/006		Zambia
SRR2145877	2000031021 (BHF_1)	C.Br.001		USA					duplicate
SRR2145878	2000031021	duplicate		USA					duplicate
SRR2155521	Canadian Bison	duplicate		Canada					duplicate
SRR2155541	Turkey32	A.Br.008/011	A.Br.008/011_Heroin	Turkey		x
SRR2155543	Pasteur	A.Br.008/011	A.Br.008/011_Pasteur	missing		x	x
SRR2155549	PAK-1	A.Br.008/011	A.Br.008/011_Heroin	Pakistan					duplicate
SRR2155551	2002013094	C.Br.001		USA					duplicate
SRR2157024	Sterne	A.Br.001/002		USA					duplicate
SRR2157175	V770-NP-1R	A.Br.003/004		USA					duplicate
SRR2157176	V770-NP-1R	A.Br.003/004							duplicate
SRR2164194	V770-NP-1R	A.Br.003/004							duplicate
SRR2164197	2002013094	C.Br.001		USA					duplicate
SRR2174561	Vollum 1B	A.Br.Vollum		USA					duplicate
SRR2174564	BA1035	B.Br.001/002_B.Br.011_BA1035		South Africa	x
SRR2175366	BA1015	A.Br.003/004		USA					duplicate
SRR2182195	Smith 1013 (Pasteur-like)	duplicate		unknown					duplicate
SRR2339125	2000032838	B.Br.001/002		unknown	x
SRR2339184	2000032891	A.Br.Aust94		unknown
SRR2339213	2002013015	A.Br.WNA	A.Br.WNA	unknown
SRR2339241	2002734244	A.Br.Vollum		USA
SRR2339291	2002734246	A.Br.Vollum		USA
SRR2339356	2002734255	A.Br.Vollum		USA
SRR2339381	2002734256	A.Br.WNA	A.Br.WNA	Haiti
SRR2339406	2002734264	A.Br.Vollum		USA
SRR2339493	2002734266	A.Br.WNA	A.Br.WNA	Haiti
SRR2339516	2002734271	A.Br.WNA	A.Br.WNA	Haiti
SRR2339549	2002734276	A.Br.Vollum		USA
SRR2339584	2002734277	A.Br.Vollum		USA
SRR2339613	2002734278	A.Br.Vollum		USA
SRR2339614	2002013017	A.Br.WNA	A.Br.WNA	unknown
SRR2339615	2002734286	A.Br.Vollum		USA
SRR2339616	2002734290	A.Br.Vollum		USA
SRR2339617	2002734291	A.Br.Vollum		USA
SRR2339618	2002734293	A.Br.Vollum		USA
SRR2339619	2002734296	A.Br.WNA	A.Br.WNA	Haiti
SRR2339620	2002013027	A.Br.WNA	A.Br.WNA	unknown
SRR2339621	2002013032	A.Br.WNA	A.Br.WNA	unknown
SRR2339622	2002013055	A.Br.WNA	A.Br.WNA	unknown					duplicate
SRR2339623	2002013058	A.Br.WNA	A.Br.WNA	unknown
SRR2339624	2002013062	A.Br.Aust94		unknown
SRR2339625	2002013064	A.Br.WNA	A.Br.WNA	unknown
SRR2339626	2002013077	A.Br.Vollum		USA
SRR2339627	2002013086	A.Br.WNA	A.Br.WNA	unknown
SRR2339628	2000032892	A.Br.Vollum
SRR2339629	2002013096	A.Br.Vollum		unknown
SRR2339630	2002013119	A.Br.Vollum		unknown
SRR2339631	2002013124	A.Br.Vollum		USA
SRR2339632	2002013125	A.Br.003/004		Paraguay
SRR2339633	2002013130	A.Br.008/011	A.Br.008/011_Heroin	missing		x
SRR2339634	2002013132	A.Br.Vollum		Pakistan
SRR2339635	2002013142	A.Br.003/004		Argentina
SRR2339636	2002013147	B.Br.001/002		USA	x
SRR2339637	2002013151	A.Br.003/004		Argentina
SRR2339638	2002013162	A.Br.Vollum		USA
SRR2339639	2000032893	A.Br.Aust94		USA
SRR2339640	2002013164	A.Br.Vollum		USA
SRR2339641	2002013165	A.Br.Vollum		USA
SRR2339642	2002013169	A.Br.Vollum		USA					redundant
SRR2339643	2002013170	A.Br.Aust94		USA
SRR2339644	2002013175	A.Br.Vollum		USA
SRR2339645	2002013178	A.Br.Vollum		USA
SRR2339647	2002013180	A.Br.Vollum		USA
SRR2339648	2002013181	A.Br.Vollum		USA
SRR2339651	2002013182	A.Br.Vollum		USA
SRR2339652	2002013187	A.Br.Vollum		USA
SRR2339653	2000032945	A.Br.008/011	A.Br.008/011_Heroin	unknown		x
SRR2339676	2002013189	A.Br.Vollum		USA
SRR2339728	2002013191	A.Br.Vollum		USA
SRR2339757	2002721537	A.Br.Vollum		USA
SRR2339823	2002721538	A.Br.Vollum		USA
SRR2339898	2002721539	A.Br.Aust94		South Africa
SRR2339940	2002721540	A.Br.Vollum		USA
SRR2339961	2002721563	A.Br.Vollum		USA
SRR2340010	2002721566	A.Br.Vollum		USA
SRR2340041	2002721567	A.Br.Vollum		USA
SRR2340073	2002721569	A.Br.Vollum		USA
SRR2340119	2002013004	A.Br.WNA	A.Br.WNA	unknown
SRR2340171	2002721570	A.Br.Vollum		USA
SRR2340230	2002721571	A.Br.Aust94		USA
SRR2340252	2002734034	A.Br.Aust94		USA
SRR2340304	2002734039	A.Br.Aust94		UK
SRR2340305	2002734047	B.Br.001/002		USA	x
SRR2340349	2002734057	A.Br.Vollum		USA
SRR2340350	2002734058	A.Br.Vollum		USA
SRR2340435	2002734060	A.Br.Vollum		USA
SRR2340460	2002734084	A.Br.WNA	A.Br.WNA	USA
SRR2340461	2002734089	A.Br.Vollum		USA
SRR2340462	2002013007	A.Br.WNA	A.Br.WNA	unknown
SRR2340463	2002734092	A.Br.Vollum		USA
SRR2340464	2002734097	A.Br.Vollum		USA
SRR2340465	2002734099	A.Br.Vollum		USA
SRR2340466	2002734109	A.Br.WNA	A.Br.WNA	Haiti
SRR2340467	2002734115	A.Br.WNA	A.Br.WNA	USA
SRR2340468	2002734116	A.Br.Vollum		USA
SRR2340469	2002734117	A.Br.Vollum		USA
SRR2340470	2002734118	A.Br.Vollum		USA
SRR2340471	2002734121	A.Br.Vollum		USA
SRR2340472	2002734126	A.Br.Vollum		USA
SRR2340474	2002734131	A.Br.Vollum		USA
SRR2340475	2002734144	A.Br.Vollum		USA
SRR2340476	2002734145	A.Br.Vollum		USA
SRR2340477	2002734147	A.Br.Vollum		USA
SRR2340478	2002734148	A.Br.Vollum		USA
SRR2340479	2002734151	A.Br.Vollum		USA
SRR2340480	2002734153	A.Br.Aust94		USA
SRR2340481	2002734157	A.Br.Vollum		USA
SRR2340482	2002734158	A.Br.Vollum		USA
SRR2340483	2002734160	A.Br.Vollum		USA
SRR2340484	2002013011	A.Br.WNA	A.Br.WNA	unknown
SRR2340485	2002734165	A.Br.Vollum		USA					cover pb
SRR2340486	2002734174	A.Br.Vollum		USA
SRR2340487	2002734175	A.Br.Vollum		USA
SRR2340488	2002734176	A.Br.Vollum		USA
SRR2340489	2002734180	A.Br.Vollum		USA
SRR2340490	2002734184	A.Br.WNA	A.Br.WNA	USA
SRR2340491	2002734187	A.Br.Vollum		USA
SRR2340492	2002734200	A.Br.Vollum		USA
SRR2340505	2002734201	A.Br.Vollum		USA
SRR2340513	2002734203	A.Br.Vollum		USA
SRR2340514	2002013014	A.Br.WNA	A.Br.WNA	unknown
SRR2340624	2002734204	A.Br.Vollum		USA
SRR2340670	2002734205	A.Br.Vollum		USA
SRR2340697	2002734211	A.Br.Vollum		USA
SRR2340730	2002734212	A.Br.Vollum		USA
SRR2340803	2002734218	A.Br.Vollum		USA
SRR2340857	2002734220	A.Br.Vollum		USA
SRR2340858	2002734224	A.Br.WNA	A.Br.WNA	Haiti
SRR2340910	2002734233	A.Br.Vollum		USA
SRR2340969	2002734236	A.Br.Vollum		USA
SRR2340986	2002734238 (SK1114; C4931C)	A.Br.Vollum		USA
SRR2891675	Canadian Bison	duplicate		Canada					duplicate
SRR2968133	A0088	A.Br.Aust94		South Africa
SRR2968134	A0091	B.Br.001/002_B.Br.008_A0091		South Africa	x
SRR2968135	A0094	A.Br.003/004		South Africa
SRR2968136	A0241	A.Br.008/011	A.Br.008/011_A0150	Turkey		x
SRR2968137	A0293	A.Br.008/011	A.Br.008/011_Pasteur	Italy		x
SRR2968138	A0684	A.Br.008/011	A.Br.008/011_Heroin	China		x
SRR2968139	A1032	A.Br.008/011	A.Br.008/011_Tsiankovskii	Albania		x
SRR2968140	A1035	A.Br.008/011	A.Br.008/011_Tsiankovskii	Albania		x
SRR2968141	21.RA93.38.4 (836)	A.Br.008/011	A.Br.008/011_Tsiankovskii	Russia		x
SRR2968144	A0002	A.Br.Aust94		Turkey			x
SRR2968145	A0656	A.Br.Aust94		China
SRR2968146	A0659	A.Br.Aust94		China
SRR2968148	A1096	A.Br.003/004		Argentina
SRR2968149	A3716	A.Br.Aust94		Namibia
SRR2968150	A0006	A.Br.005/006		Australia
SRR2968151	A0017	A.Br.005/006		Zambia
SRR2968152	A0026	A.Br.005/006		UK
SRR2968153	A0033	A.Br.008/011	A.Br.008/011_STI	China		x
SRR2968154	A0062	A.Br.008/011	A.Br.008/011_Tsiankovskii	Poland		x
SRR2968155	A0083	A.Br.Aust94		Germany
SRR2968156	A0128	A.Br.005/006		South Africa
SRR2968157	A0135	A.Br.005/006		Tanzania
SRR2968158	A0224	A.Br.Aust94		Australia
SRR2968159	A0245	A.Br.008/011	A.Br.008/011_A0245	Turkey		x	x
SRR2968160	A0252	A.Br.Aust94		Zimbabwe
SRR2968161	A0363	A.Br.Vollum		Norway
SRR2968162	A0380	A.Br.Vollum		Ireland
SRR2968163	A0386	A.Br.Aust94		UK
SRR2968164	A0404	A.Br.Aust94		India
SRR2968165	A0455	A.Br.Aust94		Mozambique
SRR2968166	A0464	A.Br.005/007		Indonesia			x
SRR2968167	A0478	A.Br.Vollum		Spain
SRR2968168	A0481	A.Br.008/011	A.Br.008/011_STI	Russia			x
SRR2968169	A0485 (STI-89)	A.Br.008/011	A.Br.008/011_STI	Russia		x
SRR2968170	A0530	A.Br.005/006		Botswana
SRR2968171	A0533	A.Br.005/006		South Africa
SRR2968172	A0604	A.Br.008/011	A.Br.008/011_STI	China		x
SRR2968173	A0615	A.Br.Vollum		China
SRR2968174	A0843	A.Br.011/009	A.Br.011/009_L1	Italy					redundant
SRR2968175	A0847	A.Br.008/011	A.Br.008/011_Pasteur	Italy		x
SRR2968176	A0853	A.Br.011/009	A.Br.011/009_L1	Italy
SRR2968177	A0854 (Ba 019)	A.Br.011/009	A.Br.011/009_L2	Italy
SRR2968178	A0860	A.Br.011/009	A.Br.011/009_L2	Italy
SRR2968179	A0862a	A.Br.011/009	A.Br.011/009_L4	Italy
SRR2968180	A0873	A.Br.011/009	A.Br.011/009_L1	Italy
SRR2968181	A0878	A.Br.011/009	A.Br.011/009_L3_PasteurII	Italy
SRR2968182	A0881 (938/D/99)	A.Br.011/009	A.Br.011/009_L1	Italy
SRR2968183	A1058	A.Br.Vollum		USA
SRR2968184	A1063	A.Br.Vollum		USA					redundant
SRR2968185	A1082 (Ba 051, 3870/LZ)	A.Br.011/009	A.Br.011/009_L1	Italy			x
SRR2968186	A11194	A.Br.008/011	A.Br.008/011_Tsiankovskii	Bulgaria		x
SRR2968187	A2075	A.Br.005/006		Tanzania
SRR2968188	A2079	A.Br.005/006		Tanzania
SRR2968189	A0001	A.Br.Aust94		Turkey
SRR2968190	A0081	A.Br.003/004		Germany
SRR2968191	A0096	A.Br.003/004		South Africa					redundant
SRR2968192	A0097	A.Br.003/004		South Africa					redundant
SRR2968193	A0103	A.Br.Aust94		Turkey
SRR2968194	A0148	A.Br.Aust94		Turkey
SRR2968195	A1101	A.Br.003/004		Argentina
SRR2968196	A1102	A.Br.003/004		Argentina					redundant
SRR2968197	A11193	A.Br.008/011	A.Br.008/011_Tsiankovskii	Bulgaria		x
SRR2968199	A0032	A.Br.008/011	A.Br.008/011_STI	China
SRR2968200	A0150	A.Br.008/011	A.Br.008/011_A0150	Turkey		x	x
SRR2968201	A0303 (81-173C-2)	A.Br.011/009	A.Br.011/009_L2	Canada
SRR2968203	A0362	A.Br.008/011	A.Br.008/011_Tsiankovskii	Norway		x
SRR2968204	A0401	A.Br.011/009	A.Br.011/009_L6	France					redundant
SRR2968205	A0417	A.Br.008/011	A.Br.008/011_STI	Hungary		x
SRR2968206	A0628	A.Br.008/011	A.Br.008/011_Tsiankovskii	China		x
SRR2968207	A0675	A.Br.008/011	A.Br.008/011_STI	China		x
SRR2968208	A0696	A.Br.008/011	A.Br.008/011_STI	China
SRR2968209	A0862b	duplicate		Italy					duplicate
SRR2968210	A0891	A.Br.011/009	A.Br.011/009_L4	Italy
SRR2968211	A0893	A.Br.011/009	A.Br.011/009_L4	Italy
SRR2968212	A0894	A.Br.011/009	A.Br.011/009_L4	Italy
SRR2968213	A1033	duplicate		Albania					duplicate
SRR2968214	A1050	A.Br.011/009	A.Br.011/009_L1	Italy
SRR2968215	A3802	A.Br.011/009	A.Br.011/009_L2	Côte d'Ivoire			x
SRR3418277	ASC609	A.Br.008/011	A.Br.008/011_STI	Kyrgyzstan					duplicate
SRR3418280	ASC610	A.Br.008/011	A.Br.008/011_STI	Kyrgyzstan
SRR3418281	ASC611	duplicate		Kyrgyzstan					duplicate
SRR3418282	ASC612	duplicate		Kyrgyzstan					duplicate
SRR3418292	ASC614	duplicate		Kyrgyzstan					duplicate
SRR3418382	ASC613	A.Br.008/011	A.Br.008/011_STI	Kyrgyzstan
SRR3954740	ISSFR-23F	cereus		International Space Station			x		B. cereus_BAclose neighbor
SRR5137561	Sterne 34F2	A.Br.001/002					x
SRR5275583	Sugar_3	A.Br.Ames		unknown					duplicate
SRR5275584	Sugar_2	A.Br.Ames		unknown					duplicate
SRR5275585	Sugar_1	A.Br.Ames		unknown					duplicate
SRR5409204	FDAARGOS_341	A.Br.001/002		USA					Sterne group
SRR5810950	2000031525	A.Br.Vollum		USA
SRR5810951	2000031522	A.Br.Vollum		USA
SRR5810952	2000031523	new_clade2		USA			x
SRR5810953	2000031518	A.Br.Vollum		USA
SRR5810954	2000031519	A.Br.Vollum		USA
SRR5810955	3000015498	A.Br.WNA	A.Br.WNA	USA
SRR5810956	2000031516	A.Br.Vollum		USA			x
SRR5810958	2000031442	A.Br.005/006		UK
SRR5810959	2002013109	A.Br.Vollum		USA
SRR5810960	3000015499	A.Br.WNA	A.Br.WNA	USA
SRR5810961	2008725092	A.Br.001/002		Bangladesh
SRR5810962	2002013088	A.Br.008/011	A.Br.008/011_Heroin	USA
SRR5810963	2002013107	A.Br.Vollum		USA
SRR5810964	2002013190	A.Br.Vollum		USA
SRR5810965	2002013192	A.Br.Vollum		USA
SRR5810966	2002013163	A.Br.Vollum		USA
SRR5810967	2002013167	A.Br.Vollum		USA
SRR5810968	2002013168	A.Br.Vollum		USA
SRR5810969	2002013171	A.Br.Vollum		USA
SRR5810970	2002013176	A.Br.Vollum		USA
SRR5810971	2002013177	A.Br.Vollum		USA
SRR5810972	2002013179	A.Br.Vollum		USA
SRR5810973	2002013185	A.Br.Vollum		USA
SRR5810974	2008724154	duplicate		USA					duplicate
SRR5810975	2008724155	A.Br.WNA	A.Br.WNA	USA
SRR5810976	2006200760	A.Br.011/009	A.Br.011/009_L2	USA
SRR5810977	2008724145	A.Br.Vollum		USA
SRR5810978	2002734832	A.Br.Ames		USA
SRR5810979	2004017841	A.Br.Ames		USA
SRR5810980	2002734827	B.Br.001/002		Bhutan	x
SRR5810981	2002734831	A.Br.Ames		USA					duplicate
SRR5810982	2002734631	duplicate		USA					duplicate
SRR5810983	2000031015	A.Br.003/004		USA			x
SRR5810984	2008724156	A.Br.WNA	A.Br.WNA	USA
SRR5810985	2008724157	A.Br.WNA	A.Br.WNA	USA
SRR5810986	2002734632	duplicate		USA					duplicate
SRR5810987	2000031695	A.Br.Vollum		USA
SRR5810988	2000031682	A.Br.Vollum		missing
SRR5810989	2000031681	A.Br.001/002		Argentina					Sterne group
SRR5810991	2000031526	A.Br.Vollum		USA
SRR5810992	2000031515	A.Br.Vollum		USA
SRR5810993	2000031692	A.Br.Vollum		USA
SRR5810994	2000031691	A.Br.Vollum		USA			x
SRR5810995	2000031688	A.Br.Vollum		missing
SRR5810996	2000032879	duplicate		Pakistan					duplicate
SRR5810997	2002013158	A.Br.Vollum		USA
SRR5810998	2002013156	A.Br.Vollum		USA
SRR5810999	2002013153	A.Br.Vollum		USA
SRR5811000	2002013152	A.Br.Vollum		USA
SRR5811001	2002013149	A.Br.Vollum		USA			x
SRR5811002	2002013143	A.Br.003/004		Argentina
SRR5811003	2002013118	A.Br.Vollum		USA
SRR5811004	2002013115	A.Br.Vollum		USA
SRR5811005	2000031057	A.Br.Vollum		USA
SRR5811006	2002013161	A.Br.Vollum		USA
SRR5811007	2002013160	A.Br.Vollum		USA
SRR5811008	2008724186	duplicate		USA					duplicate
SRR5811009	2008724185	duplicate		USA					duplicate
SRR5811010	2008724188	B.Br.001/002		USA					duplicate
SRR5811011	2008724187	A.Br.WNA	A.Br.WNA	USA
SRR5811012	2008724181	A.Br.WNA	A.Br.WNA	USA
SRR5811013	2008724158	A.Br.WNA	A.Br.WNA	USA
SRR5811014	2002734195	A.Br.Vollum		USA
SRR5811015	2002734193	A.Br.Vollum		USA
SRR5811016	2002734186	A.Br.Vollum		USA
SRR5811017	2002734183	A.Br.Vollum		USA
SRR5811018	2002734167	A.Br.Aust94		USA
SRR5811019	2002734163	A.Br.Vollum		USA
SRR5811020	2002734162	A.Br.Vollum		USA
SRR5811021	2002734156	A.Br.Vollum		USA			x		redundant
SRR5811022	2002734152	A.Br.Vollum		USA
SRR5811023	2002734146	A.Br.Vollum		USA
SRR5811024	2000031757	A.Br.005/006		missing
SRR5811025	2000031758	C.Br.001		missing
SRR5811026	2000031762	A.Br.008/011	A.Br.008/011_Heroin	missing		x
SRR5811027	2000031764	A.Br.WNA	A.Br.WNA	missing
SRR5811028	2000031709	A.Br.Vollum		USA					duplicate
SRR5811029	2000031710	A.Br.Vollum		USA
SRR5811030	2000031754	A.Br.Vollum		missing
SRR5811031	2000031756	A.Br.Vollum		USA
SRR5811032	2000031707	A.Br.Vollum		missing
SRR5811033	2000031765	A.Br.WNA	A.Br.WNA	missing
SRR5811034	2000031766	A.Br.WNA	A.Br.WNA	USA
SRR5811035	2000032992	A.Br.Vollum		USA			x
SRR5811036	2013833043	A.Br.WNA	A.Br.WNA	USA
SRR5811037	2000031075	duplicate		South Africa					duplicate
SRR5811038	2000032979	duplicate		USA					duplicate
SRR5811039	2002721552	A.Br.Vollum		USA			x
SRR5811040	2002721553	A.Br.Vollum		USA
SRR5811041	2002721549	A.Br.Vollum		USA
SRR5811042	2002721550	A.Br.Vollum		USA
SRR5811043	2002721559	A.Br.Vollum		USA
SRR5811044	2002721561	A.Br.Vollum		USA
SRR5811045	2002721556	A.Br.Vollum		USA
SRR5811046	2002721558	A.Br.Vollum		USA
SRR5811047	2000032832	A.Br.WNA	A.Br.WNA	missing					duplicate
SRR5811048	2002721562	A.Br.Vollum		USA
SRR5811049	2002721564	A.Br.Vollum		USA
SRR5811050	2002013111	A.Br.Vollum		USA
SRR5811051	2008724191	A.Br.WNA	A.Br.WNA	USA
SRR5811052	2008724192	A.Br.WNA	A.Br.WNA	USA
SRR5811053	2008724217	A.Br.WNA	A.Br.WNA	USA
SRR5811054	2008724218	A.Br.WNA	A.Br.WNA	USA					duplicate
SRR5811055	2008724219	A.Br.WNA	A.Br.WNA	USA
SRR5811056	2008724220	A.Br.WNA	A.Br.WNA	USA
SRR5811057	2008724221	A.Br.WNA	A.Br.WNA	USA					duplicate
SRR5811058	2008724717	A.Br.005/006		Uganda
SRR5811059	2008724724	A.Br.001/002		Bangladesh
SRR5811060	2008724737	A.Br.WNA	A.Br.WNA	USA
SRR5811061	2000031049	A.Br.Vollum		USA
SRR5811062	2000032989	A.Br.WNA	A.Br.WNA	missing					duplicate
SRR5811063	2002013074	A.Br.Vollum		USA
SRR5811064	2000031770	A.Br.WNA	A.Br.WNA	missing
SRR5811065	2000031767	A.Br.WNA	A.Br.WNA	missing
SRR5811066	2000032073	A.Br.Vollum		USA
SRR5811067	2000032067	A.Br.WNA	A.Br.WNA	USA
SRR5811068	2000032819	A.Br.WNA	A.Br.WNA	missing
SRR5811069	2000032808	B.Br.001/002		USA
SRR5811070	2000031051	A.Br.Vollum		USA
SRR5811071	2000032823	A.Br.001/002		missing
SRR5811072	2008724183	duplicate		USA					duplicate
SRR5811073	2000031694	A.Br.Vollum		USA
SRR5811074	2008724182	duplicate		USA					duplicate
SRR5811075	2002013026	A.Br.WNA	A.Br.WNA	missing
SRR5811076	2002013082	A.Br.005/006		South Africa
SRR5811077	2002013194	A.Br.Vollum		USA
SRR5811078	2002013193	A.Br.Vollum		USA
SRR5811079	2002013199	B.Br.001/002		USA	x
SRR5811080	2002013195	A.Br.Aust94		South Africa
SRR5811081	2002721536	A.Br.Vollum		USA
SRR5811082	2002721535	A.Br.Aust94		South Africa
SRR5811083	2002721543	A.Br.Vollum		USA
SRR5811084	2002721542	A.Br.WNA	A.Br.WNA	USA
SRR5811085	2002721547	A.Br.Aust94		South Africa
SRR5811086	2002721544	A.Br.Vollum		USA
SRR5811087	2008724872	A.Br.Ames		USA			x
SRR5811088	2008724858	A.Br.Vollum		USA
SRR5811089	2008724190	B.Br.001/002		USA	x
SRR5811090	2008724813	A.Br.Ames		USA
SRR5811091	2008724812	A.Br.WNA	A.Br.WNA	USA
SRR5811092	2008724811	duplicate		USA					duplicate
SRR5811093	2002013021	A.Br.WNA	A.Br.WNA	missing
SRR5811094	2008724189	B.Br.001/002		USA					duplicate
SRR5811095	2002013008	A.Br.WNA	A.Br.WNA	missing
SRR5811096	2002013083	A.Br.WNA	A.Br.WNA	USA
SRR5811097	2000032951	duplicate		missing					duplicate
SRR5811098	2000032955	A.Br.008/011	A.Br.008/011_Heroin	missing		x
SRR5811099	2000032933	A.Br.Vollum		USA
SRR5811100	2000032934	A.Br.008/011	A.Br.008/011_Heroin	USA		x
SRR5811101	2000032964	A.Br.Vollum		USA
SRR5811102	2000032967	duplicate		missing					duplicate
SRR5811103	2000032958	A.Br.Vollum		USA
SRR5811104	2000032960	A.Br.Vollum		USA
SRR5811105	2000032968	duplicate		missing					duplicate
SRR5811106	2000032975	duplicate		missing					duplicate
SRR5811107	2008724920	A.Br.WNA	A.Br.WNA	USA
SRR5811108	2000032899	B.Br.001/002		USA	x
SRR5811109	2002013010	A.Br.WNA	A.Br.WNA	missing
SRR5811110	2008725069	A.Br.WNA	A.Br.WNA	USA
SRR5811111	2008725080	A.Br.WNA	A.Br.WNA	USA
SRR5811112	2008725013	A.Br.WNA	A.Br.WNA	USA
SRR5811113	2008725014	duplicate		USA					duplicate
SRR5811114	2008725011	A.Br.WNA	A.Br.WNA	USA
SRR5811115	2008725012	duplicate		USA					duplicate
SRR5811116	2008725019	A.Br.Ames		USA
SRR5811117	2008725020	A.Br.WNA	A.Br.WNA	USA
SRR5811118	2008725015	A.Br.Vollum		USA
SRR5811119	2008725017	A.Br.WNA	A.Br.WNA	USA
SRR5811120	2002734049	A.Br.Vollum		UK
SRR5811121	2002734054	A.Br.Aust94		USA
SRR5811122	2002734062	A.Br.Vollum		USA
SRR5811123	2002734065	A.Br.Aust94		UK
SRR5811124	2002734036	A.Br.Aust94		USA
SRR5811125	2002734037	A.Br.Aust94		USA
SRR5811126	2002734040	B.Br.001/002		USA	x
SRR5811127	2002734044	A.Br.Vollum		USA
SRR5811128	2002734066	A.Br.Vollum		USA
SRR5811129	2002734067	A.Br.Vollum		USA
SRR5811130	2000032998	A.Br.008/011	A.Br.008/011_Heroin	USA		x
SRR5811132	3000015247	duplicate		Bangladesh					duplicate
SRR5811133	3000015246	duplicate		Bangladesh					duplicate
SRR5811134	3000015506	A.Br.WNA	A.Br.WNA	USA
SRR5811135	2002013053	A.Br.WNA	A.Br.WNA	missing
SRR5811136	2002013028	A.Br.WNA	A.Br.WNA	missing
SRR5811137	2008724999	A.Br.001/002		Bangladesh
SRR5811138	2008725081	A.Br.WNA	A.Br.WNA	USA					duplicate
SRR5811139	2010719149	A.Br.011/009	A.Br.011/009_L4	USA
SRR5811140	2008725094	A.Br.001/002		Bangladesh
SRR5811142	2011218264	A.Br.001/002		USA
SRR5811143	2008724997	A.Br.001/002		Bangladesh
SRR5811145	2002721574	A.Br.Vollum		USA
SRR5811146	2002721573	A.Br.Vollum		USA
SRR5811147	2002721568	A.Br.Vollum		USA
SRR5811148	2002721565	A.Br.Vollum		USA
SRR5811149	2002721580	A.Br.003/004		Paraguay					redundant
SRR5811150	2002721579	A.Br.008/011	A.Br.008/011_Heroin	missing		x
SRR5811151	2002721578	A.Br.Vollum		missing
SRR5811152	2002721575	A.Br.Vollum		USA
SRR5811153	2002721585	A.Br.Vollum		missing
SRR5811154	2002721583	duplicate		missing					duplicate
SRR5811155	2000031027	duplicate		USA					duplicate
SRR5811156	2002721572B	duplicate		USA					duplicate
SRR5811157	3000015252	duplicate		Bangladesh					duplicate
SRR5811158	2008724832	A.Br.001/002		Bangladesh
SRR5811159	2000031030	A.Br.Vollum		USA					duplicate
SRR5811160	2000031031	duplicate		USA					duplicate
SRR5811161	2000031036	A.Br.WNA	A.Br.WNA	USA
SRR5811162	2000031037	A.Br.Vollum		USA
SRR5811163	2000031038	A.Br.005/007		missing
SRR5811164	2000031039	A.Br.003/004		missing					duplicate
SRR5811165	2000031040	A.Br.Vollum		missing
SRR5811166	2000031041	B.Br.001/002		USA	x
SRR5811167	2000031042	A.Br.001/002		Pakistan
SRR5811168	2000031043	A.Br.Vollum		USA
SRR5811169	2000031028	A.Br.Vollum		USA
SRR5811170	2008724996	A.Br.WNA	A.Br.WNA	USA
SRR5811171	3000015257	duplicate		Bangladesh					duplicate
SRR5811172	3000015495	A.Br.WNA	A.Br.WNA	USA
SRR5811173	3000015496	A.Br.WNA	A.Br.WNA	USA
SRR5811174	3000015497	A.Br.WNA	A.Br.WNA	USA
SRR5811175	3000015248	A.Br.001/002		Bangladesh
SRR5811176	3000015250	A.Br.001/002		Bangladesh
SRR5811177	2002734101	A.Br.Vollum		USA			x
SRR5811178	2002734143	A.Br.Vollum		USA
SRR5811179	2002734098	A.Br.Vollum		USA					duplicate
SRR5811180	2002734100	A.Br.Vollum		USA					redundant
SRR5811181	2002734088	A.Br.Vollum		USA
SRR5811182	2002734090	A.Br.Vollum		USA
SRR5811183	2002734085	A.Br.Vollum		USA
SRR5811184	2002734086	A.Br.Vollum		USA			x
SRR5811185	2002734082	A.Br.Vollum		USA
SRR5811186	2002734083	A.Br.Vollum		USA
SRR5811187	2000031009	A.Br.Aust94		Thailand
SRR5811188	3000015251	A.Br.001/002		Bangladesh
SRR5811189	2000031023	A.Br.003/004		missing
SRR5811190	2000031024	A.Br.Vollum		USA
SRR5811191	2000031001	A.Br.WNA	A.Br.WNA	Canada
SRR5811192	2000031004	A.Br.003/004		Argentina
SRR5811193	2000031006	A.Br.WNA	A.Br.WNA	USA					duplicate
SRR5811194	2000031008	duplicate		USA					duplicate
SRR5811195	2002734621	A.Br.Ames		USA
SRR5811196	2002734628	duplicate		USA					duplicate
SRR5811197	2002734629	duplicate		USA					duplicate
SRR5811198	2002734630	duplicate		USA					duplicate
SRR5811199	2002734582	duplicate		USA					duplicate
SRR5811200	2002734583	A.Br.Vollum		USA
SRR5811201	2002734584	duplicate		USA					duplicate
SRR5811202	2002734585	duplicate		USA					duplicate
SRR5811203	2002734197	A.Br.Vollum		USA
SRR5811204	2002734213	A.Br.Vollum		USA
SRR5811205	2002734235	A.Br.Vollum		USA
SRR5811206	2002734240	A.Br.Vollum		USA
SRR5811207	2002734247	A.Br.WNA	A.Br.WNA	Haiti
SRR5811208	2002734251	A.Br.Vollum		USA
SRR5811209	2002734283	A.Br.Vollum		USA
SRR5811210	2002734295	A.Br.WNA	A.Br.WNA	Haiti
SRR5811211	2002734322	A.Br.011/009	A.Br.011/009_L3_PasteurII	Argentina
SRR5811212	2002734373	A.Br.001/002		Hong Kong
SRR5811213	2000031054	A.Br.Vollum		USA			x
SRR5811214	2000031052	C.Br.001		USA					duplicate
SRR5811215	2000031045	A.Br.Aust94		South Africa
SRR5811216	2000031044	A.Br.Vollum		USA
SRR5811217	2000031048	new_clade1		missing			x
SRR5811218	2000031046	B.Br.001/002		USA
SRR5811219	2002013061	A.Br.001/002		Thailand
SRR5811220	3000015503	A.Br.WNA	A.Br.WNA	USA
SRR5811221	3000015502	A.Br.Vollum		USA
SRR5811222	3000015501	A.Br.WNA	A.Br.WNA	USA
SRR5811223	3000015500	A.Br.WNA	A.Br.WNA	USA
SRR5811224	2002734081	A.Br.Vollum		USA
SRR5811225	2002734080	A.Br.Vollum		USA
SRR5811226	3000015505	A.Br.WNA	A.Br.WNA	USA
SRR5811227	3000015504	A.Br.WNA	A.Br.WNA	USA
SRR5811228	2002734075	A.Br.Vollum		USA
SRR5811229	2002734073	A.Br.Vollum		missing
SRR5811230	2002734078	A.Br.Vollum		USA
SRR5811231	2002734076	A.Br.Vollum		USA
SRR5811232	2002734070	A.Br.Vollum		USA			x
SRR5811233	2002734068	A.Br.Vollum		USA
SRR5811234	2002734072	A.Br.Vollum		USA
SRR5811235	2002734071	A.Br.Vollum		USA
SRR5811236	2002734826	A.Br.WNA	A.Br.WNA	USA
SRR5811237	2002734765	A.Br.011/009	A.Br.011/009_L2	USA
SRR5811238	2002013060	A.Br.Vollum		USA			x
SRR5811239	2002734735	A.Br.WNA	A.Br.WNA	USA
SRR5811240	2002734635	duplicate		USA					duplicate
SRR5811241	2002734634	duplicate		USA					duplicate
SRR5811242	2002734633	A.Br.WNA	A.Br.WNA	USA
SRR5811243	2002734752	A.Br.WNA	A.Br.WNA	USA
SRR5811244	2002734744	A.Br.Ames		USA
SRR5811245	2002734743	A.Br.WNA	A.Br.WNA	USA
SRR5811246	2002734737	A.Br.WNA	A.Br.WNA	USA
SRR5811247	2002013070	A.Br.WNA	A.Br.WNA	Canada
SRR5811248	2000031524	A.Br.Vollum		USA
SRR5947105	2000031021	C.Br.001		USA			x
SRR5947106	2002013094	C.Br.001		USA					duplicate
SRR6037789	COVASU	A.Br.Vollum		India
SRR6743366	3000496652	A.Br.WNA	A.Br.WNA	USA
SRR6743367	3000496651	A.Br.Ames		USA					redundant
SRR6743368	2008724184	A.Br.Vollum		USA
SRR6743369	2002734279	B.Br.001/002		USA
SRR6743370	2000032839	B.Br.001/002		USA
SRR6743371	2000032065	A.Br.Ames		USA					redundant
SRR7611049	2000031103 (Strain 32)	A.Br.Aust94		United Kingdom
SRR7611050	UT308	A.Br.Aust94
SRR7611051	2007740863 (SK57)	A.Br.Aust94		United Kingdom
SRR940501	Ames	duplicate		USA					duplicate
SRR940502	Ames	duplicate		USA					duplicate
SRR940503	Ames	duplicate		USA					duplicate
SRR940504	Ames	duplicate		USA					duplicate
SRR940690	Ames	duplicate		USA					duplicate
SRR940691	Ames	duplicate		USA					duplicate
SRR940692	Ames	duplicate		USA					duplicate
SRR974942	SVA11_Cow1	B.Br.001/002		Sweden					duplicate
SRR974943	SVA11	B.Br.001/002							duplicate
SRR974946	SVA11_cow3PC	B.Br.001/002		Sweden					duplicate
SRR974955	SVA11	B.Br.001/002							duplicate
SRR974956	SVA11	B.Br.001/002_B.Br.009_SVA11		Sweden	x
SRR974958	SVA11	B.Br.001/002		Sweden					duplicate
SRR974959	SVA11	B.Br.001/002							duplicate
SRR974960	SVA11	B.Br.001/002		Sweden					duplicate
SRR974962	SVA11	B.Br.001/002		Sweden					duplicate
SRR975061	SVA11	B.Br.001/002		Sweden					duplicate
