# Supplementary material for: Insights from Bacillus anthracis strains isolated from permafrost in the tundra zone of Russia
Source: PLoS One. 2019 May 22;14(5):e0209140. doi: 10.1371/journal.pone.0209140 (PMC6530834; doi:10.1371/journal.pone.0209140)
Supplement: S2 Table — (XLSX) [file pone.0209140.s004.xlsx]

## Sheet: Лист1
				S3 Table. The MLVA profiles of described strains
				Loci	Strains
					A-clade strains from Yakutia and closest neighbor from SRCAMB collection			B-clade strains from Yakutia and Yamal, and closest neighbors from SRCAMB collection
					3Ya	4Ya	1056/51	5Ya	Four Yamal strains	I-364	157(B-1107)	44
				vrrA	5	4	5	3	3	3	3	3
				vrrB1	19	19	19	22	22	23	23	18
				vrrB2	14	14	14	14	14	16	16	12
				vrrC1					53
				vrrC2	22	22	22	17	17	17	22	NA*
				CG3					2
				pXO1aat					9
				pXO2at					7
				Bams-01	13	13	13	14	14	14	14	14
				Bams-03	30	30	30	27	27	27	27	NA*
				Bams-05	7	7	7	7	7	7	7	7
				Bams-13					27
				Bams-15					45
				Bams-21	10	10	10	10	10	10	10	10
				Bams-22	14	16	14	15	15	15	15	15
				Bams-23	9	11	9	10	10	10	10	10
				Bams-24	11	11	11	11	11	11	11	11
				Bams-25	13	13	13	13	13	13	13	13
				Bams-28	15	14	15	12	12	15	14	14
				Bams-30					17
				Bams-31					85
				Bams-34	9	9	9	9	NA*	9	9	9
				Bams-44	8	8	8	8	8	8	8	8
				Bams-51	9	9	9	6	6	6	6	6
				Bams-53			8		6	6	6	NA*
				vntr23	4	4	4	3	3	3	3	3
				Loci whose size was not determined for a particular strain are shaded gray.
				*NA - no amplification
